# Supplementary material for: From building blocks of proteins to drugs: a quantum chemical study on structure–property relationships of phenylalanine, tyrosine and dopa
Source: Royal Society of Chemistry journal article supplement (doi:10.1039/c3ra47364c), 2014-01-01
Supplement: c3ra47364c.pdf [file c3ra47364c.pdf]

# **From building blocks of proteins to drugs: A quantum chemical study on structure-property relationships of phenylalanine, tyrosine and dopa**

Aravindhyan Ganesan\*<sup>‡</sup>, Narges Mohammadi and Feng Wang\*

eChemistry Laboratory, Department of Chemistry and Biotechnology, School of Science, Faculty of Sciences, Engineering and Technology, Swinburne University of Technology, Hawthorn, Victoria 3122, Australia.

\*Corresponding authors

Aravindhyan Ganesan: [aganesan@daad-alumni.de](mailto:aganesan@daad-alumni.de)

Feng Wang: [fwang@swin.edu.au](mailto:fwang@swin.edu.au)

## **Supplementary Information**

---

<sup>‡</sup> Current Address: Research School of Chemistry, Australian National University, Canberra, ACT 0200 Australia.

SI.1: Comparison of the calculated and experimental geometries of L-tyr and L-dopa.

| Parameters                                                                            | L-phe      |            | L-tyr            |      | L-dopa     |                  |       |
|---------------------------------------------------------------------------------------|------------|------------|------------------|------|------------|------------------|-------|
|                                                                                       | This Work* | This Work* | Exp <sup>1</sup> | Δ    | This Work* | Exp <sup>2</sup> | Δ     |
| C <sub>(1)</sub> =O <sub>(1)</sub> /Å                                                 | 1.20       | 1.20       | 1.24             | 0.04 | 1.20       | 1.25             | 0.05  |
| C <sub>(1)</sub> -O <sub>(2)</sub> /Å                                                 | 1.34       | 1.34       | 1.26             | 0.08 | 1.34       | 1.25             | 0.09  |
| C <sub>(1)</sub> -C <sub>(α)</sub> /Å                                                 | 1.55       | 1.55       | 1.53             | 0.02 | 1.55       | 1.54             | 0.01  |
| C <sub>(α)</sub> -N/Å                                                                 | 1.47       | 1.47       | 1.49             | 0.02 | 1.47       | 1.46             | 0.01  |
| C <sub>(α)</sub> -C <sub>(β)</sub> /Å                                                 | 1.55       | 1.55       | 1.54             | 0.01 | 1.55       | 1.53             | 0.02  |
| C <sub>(β)</sub> -C <sub>(γ)</sub> /Å                                                 | 1.51       | 1.51       | 1.51             | 0.00 | 1.51       | 1.51             | 0.00  |
| C <sub>(4)</sub> -O <sub>(3)</sub> /Å                                                 |            | 1.37       | 1.37             | 0.00 | 1.37       | 1.37             | 0.00  |
| C <sub>(3)</sub> -O <sub>(4)</sub> /Å                                                 |            |            |                  |      | 1.36       | 1.36             |       |
| R <sub>6</sub> /Å                                                                     | 8.37       | 8.38       | 8.36             | 0.02 | 8.38       | 8.37             | -0.01 |
| O <sub>(1)</sub> =C <sub>(1)</sub> -O <sub>(2)</sub> / <sup>0</sup>                   | 123.29     | 123.23     | 126.40           | 3.17 | 123.18     | 126.10           | 2.92  |
| C <sub>(1)</sub> -C <sub>(α)</sub> -N/ <sup>0</sup>                                   | 109.02     | 108.96     | 109.70           | 0.74 | 108.87     | 110.00           | 1.14  |
| C <sub>(1)</sub> -C <sub>(α)</sub> -C <sub>(β)</sub> / <sup>0</sup>                   | 111.84     | 111.81     | 111.10           | 0.71 | 111.82     | 109.80           | 2.02  |
| N-C <sub>(α)</sub> -C <sub>(β)</sub> / <sup>0</sup>                                   | 116.30     | 116.03     | 110.80           | 5.23 | 115.96     | 110.60           | 5.36  |
| C <sub>(α)</sub> -C <sub>(β)</sub> -C <sub>(γ)</sub> / <sup>0</sup>                   | 114.01     | 114.09     | 114.50           | 0.41 | 113.98     | 114.00           | 0.02  |
| C <sub>(3)</sub> -C <sub>(4)</sub> -C <sub>(5)</sub> / <sup>0</sup>                   | 119.57     | 119.54     | 120.20           | 0.66 | 118.97     | 120.30           | 1.33  |
| O <sub>(1)</sub> =C <sub>(1)</sub> -O <sub>(2)</sub> -H/ <sup>0</sup>                 | 177.81     | 177.79     |                  |      | 177.40     |                  |       |
| O <sub>(1)</sub> =C <sub>(1)</sub> -C <sub>(α)</sub> -N/ <sup>0</sup>                 | -165.72    | -165.75    |                  |      | -165.47    |                  |       |
| O <sub>(2)</sub> -C <sub>(1)</sub> -C <sub>(α)</sub> -N/ <sup>0</sup>                 | 16.59      | 16.40      |                  |      | 16.40      |                  |       |
| O <sub>(1)</sub> =C <sub>(1)</sub> -C <sub>(α)</sub> -C <sub>(β)</sub> / <sup>0</sup> | -35.71     | -36.19     |                  |      | -36.04     |                  |       |
| O <sub>(2)</sub> -C <sub>(1)</sub> -C <sub>(α)</sub> -C <sub>(β)</sub> / <sup>0</sup> | 146.60     | 146.11     |                  |      | 145.83     |                  |       |
| C <sub>(1)</sub> -C <sub>(α)</sub> -C <sub>(β)</sub> -C <sub>(γ)</sub> / <sup>0</sup> | -73.89     | -73.36     |                  |      | -72.36     |                  |       |
| N-C <sub>(α)</sub> -C <sub>(β)</sub> -C <sub>(γ)</sub> / <sup>0</sup>                 | 52.25      | 52.52      |                  |      | 53.25      |                  |       |

\*B3LYP/6-311G\*\*

SI.2: Intra-molecular H-bonds of the aromatic molecules (Å) with a cut-off of 2.80 Å.

| Parameters                                       | L-phe | L-tyr | L-dopa |
|--------------------------------------------------|-------|-------|--------|
| N <sup>⋯</sup> H-O <sub>(2)</sub>                | 1.89  | 1.88  | 1.89   |
| O <sub>(1)</sub> <sup>⋯</sup> H-C <sub>(α)</sub> | 2.81  | 2.81  | 2.81   |
| O <sub>(1)</sub> <sup>⋯</sup> H-C <sub>(β)</sub> | 2.55  | 2.55  | 2.58   |
| O <sub>(1)</sub> <sup>⋯</sup> H-C <sub>(2)</sub> | 2.61  | 2.59  | 2.54   |
| O <sub>(3)</sub> <sup>⋯</sup> H-C <sub>(5)</sub> |       | 2.57  | 2.60   |
| O <sub>(3)</sub> <sup>⋯</sup> H-C <sub>(3)</sub> |       | 2.69  |        |
| O <sub>(4)</sub> <sup>⋯</sup> H-O <sub>(3)</sub> |       |       | 2.13   |
| O <sub>(4)</sub> <sup>⋯</sup> H-C <sub>(2)</sub> |       |       | 2.71   |

### SI.2 discussion:

The Table SI.2 presents all the possible H-bonds in L-phe, L-tyr and L-dopa that are  $\leq 2.80$  Å cut-off. In L-phe, there are four major H-bonds, three within the amino acid moiety, such as O<sub>(1)</sub><sup>⋯</sup>H-C<sub>(α)</sub>, N<sup>⋯</sup>H-O<sub>(2)</sub> and O<sub>(1)</sub><sup>⋯</sup>H-C<sub>(β)</sub>, and one between the carbonyl and phenyl ring, i.e., O<sub>(1)</sub><sup>⋯</sup>H-C<sub>(2)</sub>. Nevertheless substitution of an OH group in the para position (of phenyl ring) in L-tyr causes a few additional H-bonds, such as O<sub>(3)</sub><sup>⋯</sup>H-C<sub>(5)</sub> and O<sub>(3)</sub><sup>⋯</sup>H-C<sub>(3)</sub>. On the other hand, L-dopa, when compared to L-phe, has three additional H-bonds including O<sub>(3)</sub><sup>⋯</sup>H-C<sub>(5)</sub>, O<sub>(4)</sub><sup>⋯</sup>H-O<sub>(3)</sub> and O<sub>(4)</sub><sup>⋯</sup>H-C<sub>(2)</sub>; those are formed due to the OH substituent on its catechol side chain. These additional bonds in L-dopa tend to affect its other H-bonds, especially those arising from the carbonyl group. For instance, the O<sub>(1)</sub><sup>⋯</sup>H-C<sub>(2)</sub> bond in L-phe and L-tyr is 2.61 Å, which becomes stronger in L-dopa with a distance of 2.54 Å. This indicates that additional OH groups in the phenyl ring tend to also affect the intra-molecular interactions between the side chains. Indeed strong intra-molecular H-bonds between amino and carboxyl groups in the amino acid moiety on one end and the H-bonds with the catechol OH groups on the other end greatly affects the flexibility in the structure of L-dopa. Lack of flexibility, therefore, may attribute to lesser number of conformers in L-dopa when compared to its amino acid precursors, L-phe and L-tyr.

SI.3: Valence vertical IPs of L-phe, L-tyr and L-dopa calculated using the SAOP/et-pVQZ and OVGF/6-311G\*\* models (eV). OVGF polestrengths are given in parantheses.

| L-phe |        |              | L-tyr |               |              |                  | L-dopa |               |              |
|-------|--------|--------------|-------|---------------|--------------|------------------|--------|---------------|--------------|
| MOs   | SAOP   | OVGF         | MOs   | SAOP          | OVGF         | EXP <sup>3</sup> | MOs    | SAOP          | OVGF         |
| 44a   | -10.49 | -8.96(0.90)  | 48a   | -9.88         | -8.14(0.90)  | 8.47             | 52a    | -9.60         | -7.85(0.90)  |
| 43a   | -10.70 | -9.18(0.90)  | 47a   | -10.61        | -9.26(0.89)  | 9.40             | 51a    | -10.27        | -8.71(0.90)  |
| 42a   | -10.78 | -9.75(0.90)  | 46a   | -10.69        | -9.71(0.90)  | 9.60             | 50a    | -10.64        | -9.76(0.90)  |
| 41a   | -11.66 | -10.91(0.90) | 45a   | -11.55        | -10.86(0.90) | 10.80            | 49a    | -11.55        | -10.88(0.90) |
| 40a   | -12.17 | -11.12(0.90) | 44a   | -12.09        | -11.13(0.90) |                  | 48a    | -12.12        | -11.22(0.90) |
| 39a   | -12.46 | -11.79(0.90) | 43a   | -12.40        | -11.60(0.85) | 11.30            | 47a    | -12.33        | -11.34(0.85) |
| 38a   | -12.50 | -11.92(0.90) | 42a   | -12.56        | -11.88(0.90) |                  | 46a    | -12.52        | -11.91(0.90) |
| 37a   | -13.13 | -12.19(0.83) | 41a   | -12.72        | -12.02(0.90) |                  | 45a    | -12.75        | -12.21(0.90) |
| 36a   | -13.31 | -12.81(0.90) | 40a   | -13.05        | -12.70(0.90) |                  | 44a    | -13.06        | -12.73(0.90) |
| 35a   | -13.80 | -13.36(0.90) | 39a   | -13.65        | -13.38(0.90) |                  | 43a    | -13.57        | -13.34(0.90) |
| 34a   | -14.10 | -13.74(0.89) | 38a   | -14.08        | -13.68(0.90) |                  | 42a    | -13.62        | -13.33(0.89) |
| 33a   | -14.50 | -14.17(0.89) | 37a   | -14.39        | -14.23(0.90) |                  | 41a    | -14.06        | -13.70(0.89) |
| 32a   | -14.54 | -14.37(0.88) | 36a   | -14.52        | -14.24(0.87) |                  | 40a    | -14.21        | -14.18(0.90) |
| 31a   | -14.91 | -14.74(0.89) | 35a   | -14.57        | -14.39(0.88) |                  | 39a    | -14.58        | -14.47(0.89) |
| 30a   | -15.40 | -15.24(0.89) | 34a   | -14.80        | -14.67(0.89) |                  | 38a    | -14.74        | -14.72(0.89) |
| 29a   | -15.49 | -15.42(0.88) | 33a   | -14.98        | -15.04(0.89) |                  | 37a    | -14.82        | -14.79(0.89) |
| 28a   | -15.69 | -15.58(0.88) | 32a   | -15.38        | -15.22(0.89) |                  | 36a    | -15.04        | -14.84(0.85) |
| 27a   | -16.03 | -15.95(0.89) | 31a   | -15.57        | -15.67(0.88) |                  | 35a    | -15.23        | -15.14(0.89) |
| 26a   | -16.81 | -16.87(0.89) | 30a   | -16.02        | -16.02(0.88) |                  | 34a    | -15.43        | -15.41(0.89) |
| 25a   | -16.94 | -17.03(0.86) | 29a   | -16.34        | -16.29(0.88) |                  | 33a    | -16.03        | -16.04(0.89) |
| 24a   | -17.88 | -18.08(0.89) | 28a   | -16.73        | -16.88(0.89) |                  | 32a    | -16.18        | -16.28(0.88) |
| 23a   | -18.75 |              | 27a   | -17.78        | -18.07(0.89) |                  | 31a    | -16.68        | -16.89(0.89) |
| 22a   | -19.19 |              | 26a   | -17.83        | -18.13(0.86) |                  | 30a    | -17.46        | -17.82(0.88) |
| 21a   | -19.34 |              | 25a   | -18.80        |              | 18.65            | 29a    | -17.84        | -18.19(0.87) |
| 20a   | -20.75 |              | 24a   | -19.14        |              |                  | 28a    | -17.99        | -18.29(0.88) |
| 19a   | -22.51 |              | 23a   | -19.76        |              | 19.40            | 27a    | -18.78        |              |
| 18a   | -22.88 |              | 22a   | -20.67        |              |                  | 26a    | -19.14        |              |
| 17a   | -23.90 |              | 21a   | -22.38        |              | 21.15            | 25a    | -20.16        |              |
| 16a   | -25.77 |              | 20a   | -22.94        |              | 22.75            | 24a    | -20.70        |              |
| 15a   | -27.38 |              | 19a   | -23.75        |              | 24.30            | 23a    | -22.37        |              |
| 14a   | -30.05 |              | 18a   | -25.68        |              | 25.90            | 22a    | -22.78        |              |
| 13a   | -32.11 |              | 17a   | -27.26        |              | 28.00            | 21a    | -23.73        |              |
|       |        |              | 16a   | -29.94        |              |                  | 20a    | -25.61        |              |
|       |        |              | 15a   | <b>-31.26</b> |              | 32.40            | 19a    | -27.25        |              |
|       |        |              | 14a   | -32.00        |              | 34.00            | 18a    | -29.97        |              |
|       |        |              |       |               |              |                  | 17a    | <b>-30.86</b> |              |
|       |        |              |       |               |              |                  | 16a    | <b>-31.58</b> |              |
|       |        |              |       |               |              |                  | 15a    | -32.03        |              |

SI.4: Valence MOs of L-DOPA from SAOP/et-pVQZ calculations

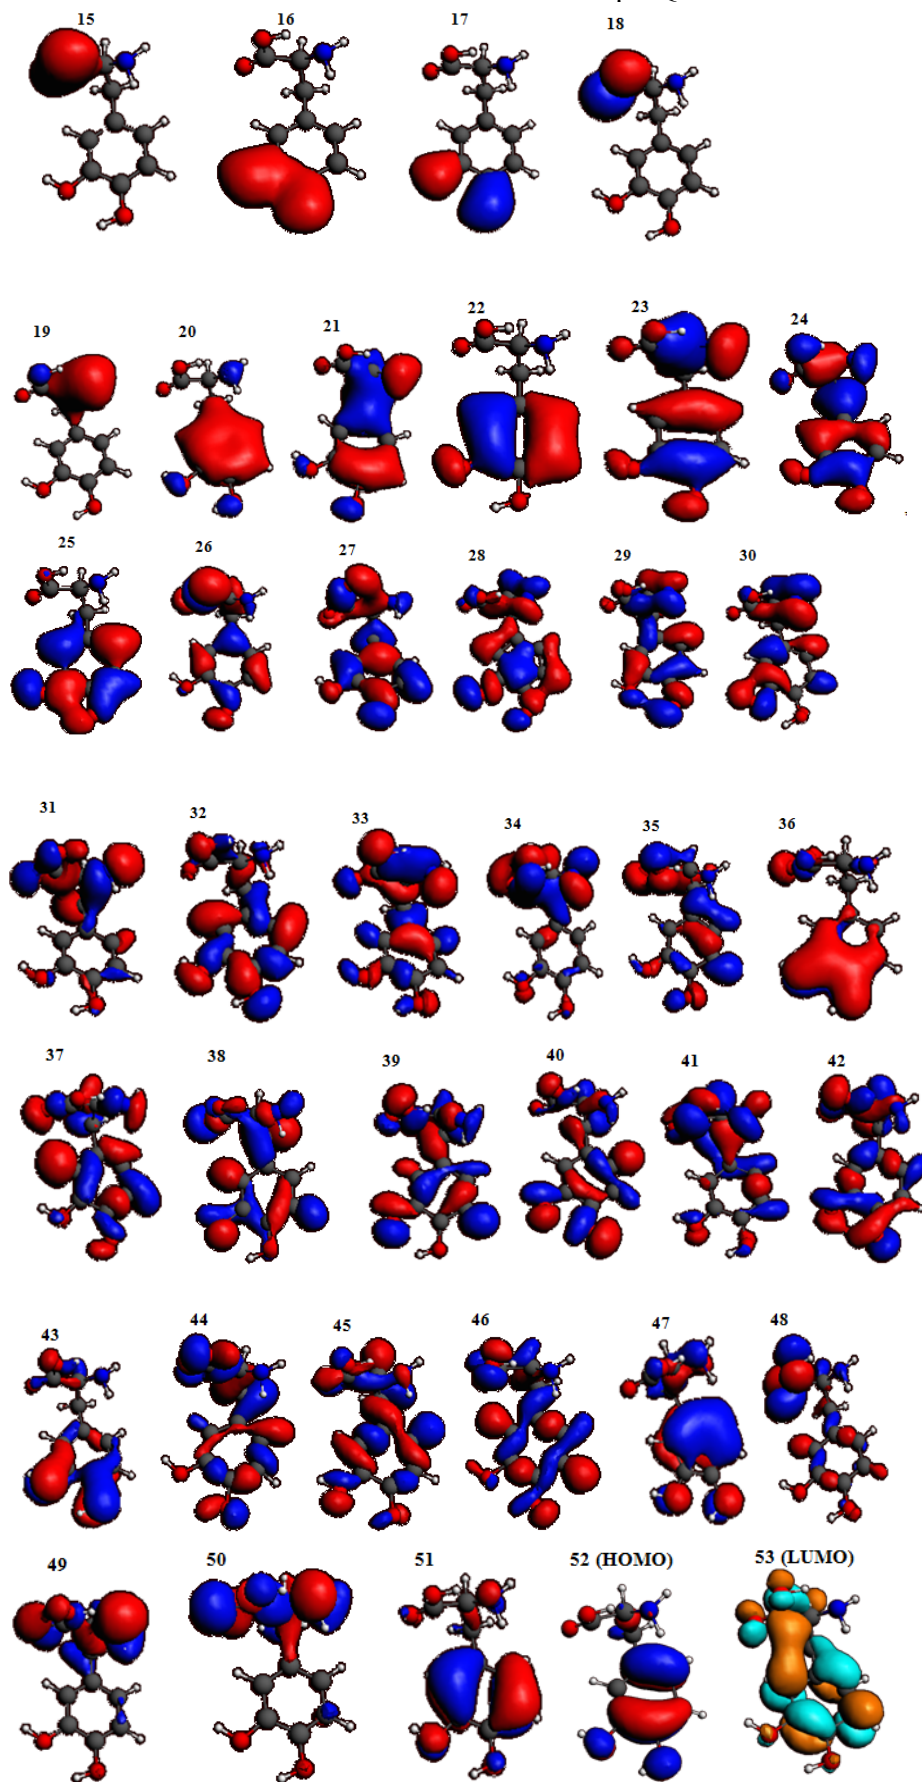

SI.5: Valence MOs of L-tyr from SAOP/et-pVQZ calculations

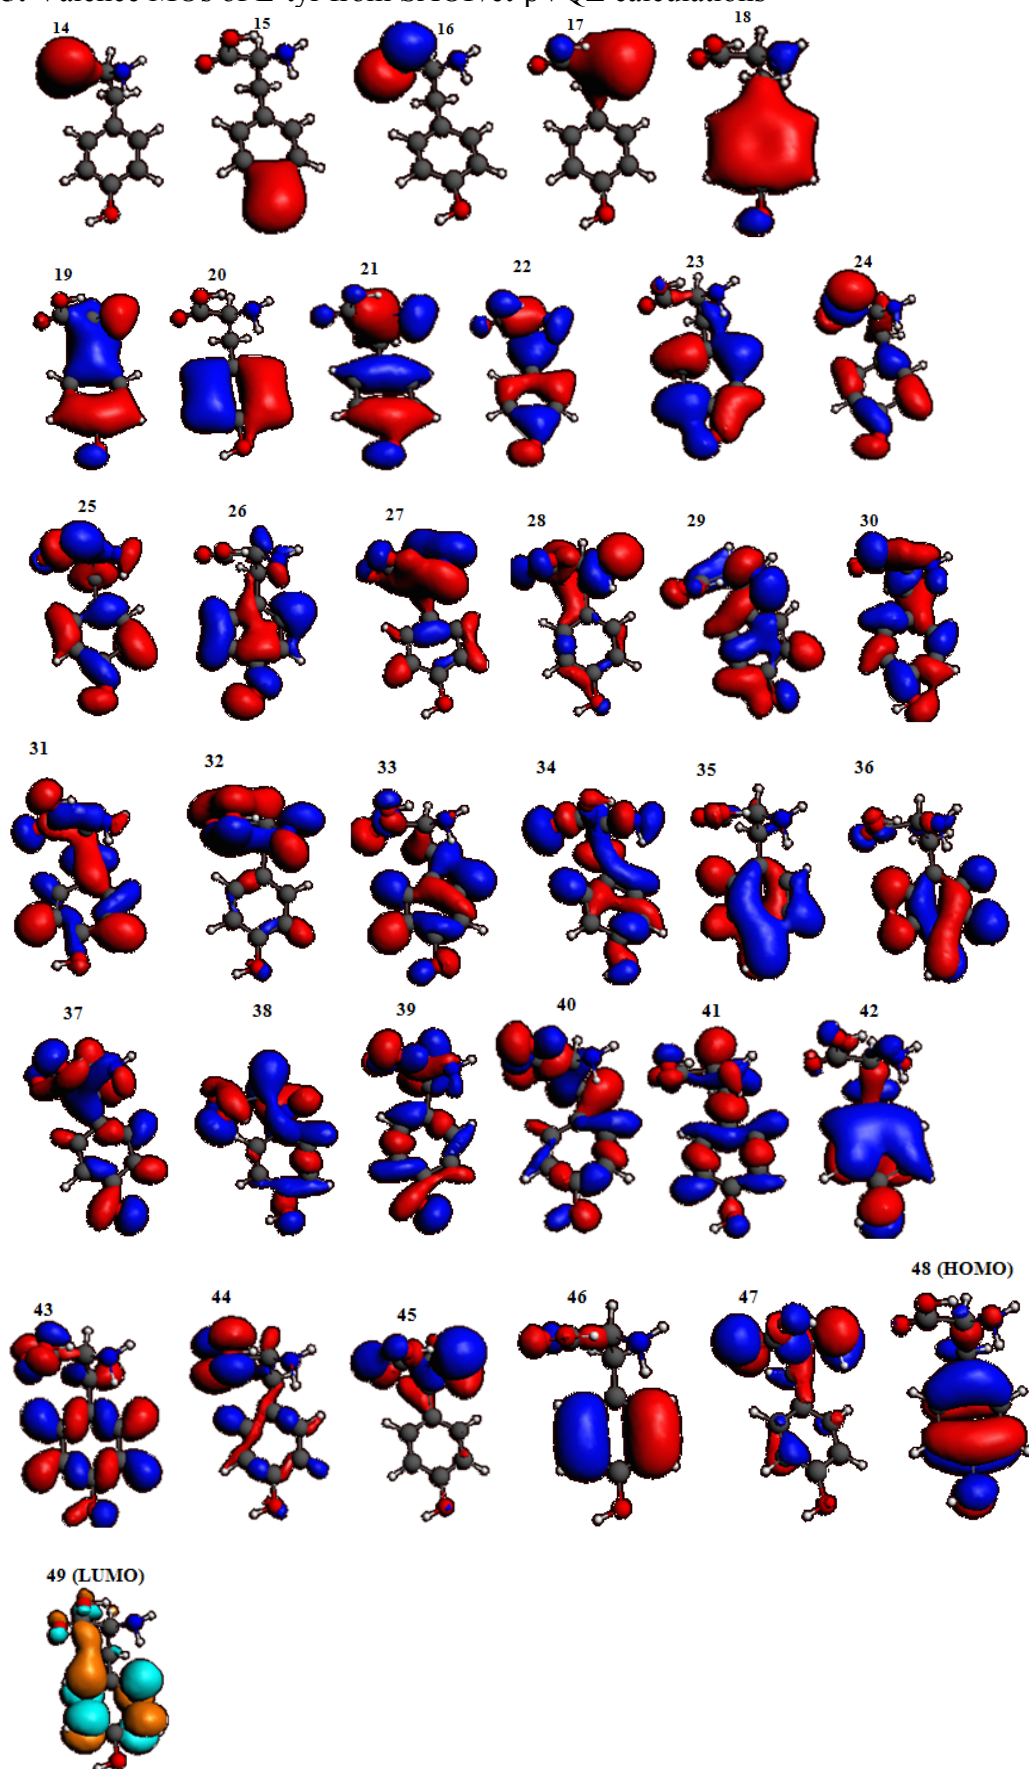

SI.6: Valence MOs of L-Phe from SAOP/et-pVQZ calculations

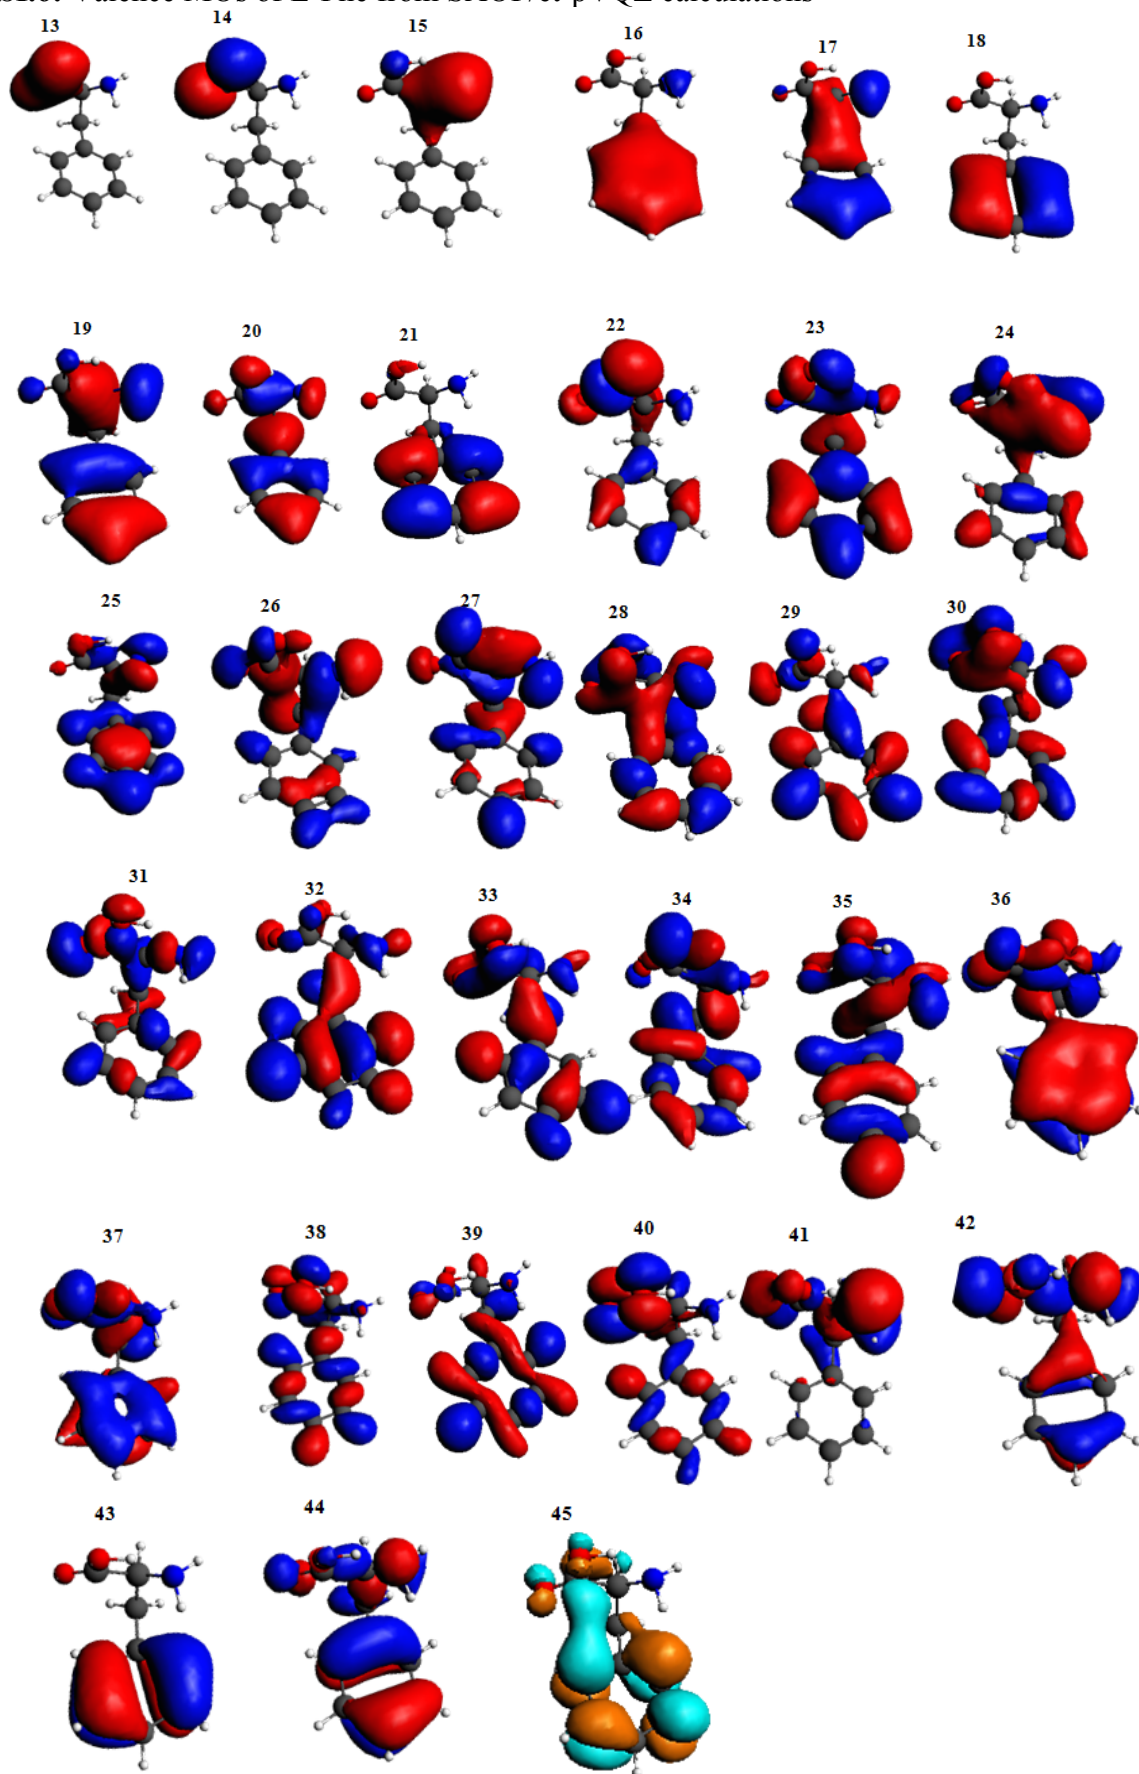

**References (Supplementary information):**

1. M. N. Frey, T. F. Koetzle, M. S. Lehmann and W. C. Hamilton, *J. Chem. Phys.*, 1973, 58, 2547-2556.
2. A. Mostad, T. Ottersen and C. Romming, *Acta Chem. Scand.*, 1970, 24, 1864-1865.
3. O. Plekan, V. Feyer, R. Richter, M. Coreno and K. C. Prince, *Mol. Phys.*, 2008, 106, 1143-1153.
